# Supplementary material for: Penta-MP5 (M = B, Al, Ga, In) monolayers as high-performance photocatalysts for overall water splitting
Source: Royal Society of Chemistry journal article supplement (doi:10.1039/d3cp02117c), 2023-01-01
Supplement: d3cp02117c1.pdf [file d3cp02117c1.pdf]

## Penta-MP<sub>5</sub> (M=B, Al, Ga, In) Monolayers as High-Performance Photocatalysts for Overall Water Splitting

Jiao Chen,<sup>1</sup> Xinyong Cai,<sup>1,\*</sup> Xiaotao Zhang,<sup>1</sup> Hongyan Wang,<sup>1,\*</sup> Yuxiang Ni,<sup>1</sup> Xuefei Liu,<sup>2</sup>  
Yuanzheng Chen<sup>a,\*</sup>

<sup>1</sup> School of Physical Science and Technology, Key Laboratory of Advanced Technologies of Materials, Ministry of Education of China, Southwest Jiaotong University, Chengdu 610031, China.

<sup>2</sup> School of Physical and Electronic Sciences, Guizhou Normal University, Guiyang 550025, China.

\*E-mail: [cyz@swjtu.edu.cn](mailto:cyz@swjtu.edu.cn), (X. C.) [caixinyong@my.swjtu.edu.cn](mailto:caixinyong@my.swjtu.edu.cn) and (Y.H.)

[hongyanw@swjtu.edu.cn](mailto:hongyanw@swjtu.edu.cn)

### Table of Contents for Supporting Information

|                                                                                                                 |           |
|-----------------------------------------------------------------------------------------------------------------|-----------|
| <b>Structures and stabilities of Penta-MP<sub>5</sub> monolayers</b> .....                                      | <b>S1</b> |
| Table S1. Lattice constants of Penta-MP <sub>5</sub> monolayers .....                                           | S1        |
| Table S2. Cohesive energy of Penta-MP <sub>5</sub> monolayers .....                                             | S1        |
| Table S3. Elastic constants $C_{mn}$ of Penta-MP <sub>5</sub> monolayers .....                                  | S1        |
| Figure S1. Structures of Penta-MP <sub>5</sub> monolayers after AIMD simulations .....                          | S2        |
| Figure S2. Phonon dispersion of Penta-MP <sub>5</sub> monolayers .....                                          | S2        |
| <b>Electronic structures of Penta-MP<sub>5</sub> monolayers for water splitting</b> .....                       | <b>S3</b> |
| Figure S3. Band structures of Penta-MP <sub>5</sub> monolayers .....                                            | S3        |
| Figure S4. Partial DOS of Penta-MP <sub>5</sub> monolayers .....                                                | S4        |
| Stable stacking patterns of bilayer Penta-MP <sub>5</sub> .....                                                 | S4        |
| Figure S5. Structural models of bilayer Penta-MP <sub>5</sub> .....                                             | S4        |
| Table S4. interlayer distance $d$ , total energies $E$ and bandgap $E_g$ of bilayer Penta-MP <sub>5</sub> ..... | S5        |
| Figure S6. band structures of bilayer Penta-MP <sub>5</sub> .....                                               | S6        |
| <b>Optical absorption and utilization of Penta-MP<sub>5</sub> monolayers for water splitting</b> .....          | <b>S7</b> |
| Computational details for the solar-to-hydrogen (STH) efficiency .....                                          | S7        |
| <b>Carrier mobilities of Penta-MP<sub>5</sub> monolayers</b> .....                                              | <b>S7</b> |
| Computational details for carrier mobilities of Penta-MP <sub>5</sub> monolayers .....                          | S7        |
| Figure S7. Total energy and shift of VBMs and CBMs respect to strain .....                                      | S8        |
| <b>Photocatalytic properties of Penta-MP<sub>5</sub> monolayers for water splitting</b> .....                   | <b>S9</b> |
| Selection of active sites on Penta-MP <sub>5</sub> monolayers .....                                             | S9        |
| Figure S8. Adsorption configurations of water molecule on Penta-MP <sub>5</sub> monolayers .....                | S10       |

Figure S9. Charge density difference of Penta-MP<sub>5</sub> monolayers absorbed water molecule .....S10  
 Computational details for free energy change of Penta-MP<sub>5</sub> monolayers. ....S10  
 Table S5. Gibbs free energy changes  $\Delta G$  (eV) in OER on Penta-MP<sub>5</sub> monolayers .....S12  
 Figure S10. Gibbs free energy changes in OER on Penta-GaP<sub>5</sub> and Penta-InP<sub>5</sub> monolayers .....S12

## Structures and stabilities of Penta-MP<sub>5</sub> monolayers

**Table S1.** The lattice constants ( $a = b$ ) and thickness ( $h$ ) of the sheet of Penta-MP<sub>5</sub> (M = B, Al, Ga, and In) monolayers and previous work are in brackets.

| Penta-MP <sub>5</sub><br>(M = B, Al, Ga, and In) | $a = b$ (Å)               | $h$ (Å) |
|--------------------------------------------------|---------------------------|---------|
| Penta-BP <sub>5</sub>                            | 4.54 (4.54 <sup>1</sup> ) | 2.51    |
| Penta-AlP <sub>5</sub>                           | 4.89 (4.89 <sup>2</sup> ) | 2.63    |
| Penta-GeP <sub>5</sub>                           | 4.91 (4.92 <sup>2</sup> ) | 2.80    |
| Penta-InP <sub>5</sub>                           | 5.06 (5.06 <sup>2</sup> ) | 2.93    |

**Table S2.** The cohesive energy of Penta-MP<sub>5</sub> (M = B, Al, Ga, and In) monolayers and previous work are in brackets.

| Penta-MP <sub>5</sub><br>(M = B, Al, Ga, and In) | Cohesive energy (eV/atom) |                    |
|--------------------------------------------------|---------------------------|--------------------|
|                                                  | Our results               | Previous works     |
| Penta-BP <sub>5</sub>                            | -4.68 <sup>1</sup>        |                    |
| Penta-AlP <sub>5</sub>                           | -4.54 <sup>2</sup>        | -4.54 <sup>2</sup> |
| Penta-GeP <sub>5</sub>                           | -4.37 <sup>2</sup>        | -4.37 <sup>2</sup> |
| Penta-InP <sub>5</sub>                           | -4.22 <sup>2</sup>        | -4.21 <sup>2</sup> |

**Table S3.** The Calculated in-plane stiffness constants  $C_{mn}$  of Penta-MP<sub>5</sub> monolayers.

| Penta-MP <sub>5</sub><br>(M = B, Al, Ga, and In) | $C_{11} = C_{22}$ | $C_{12}$ | $C_{66}$ |
|--------------------------------------------------|-------------------|----------|----------|
| Penta-BP <sub>5</sub>                            | 72.86             | 13.62    | 52.25    |
| Penta-AlP <sub>5</sub>                           | 56.70             | 10.40    | 28.19    |
| Penta-GaP <sub>5</sub>                           | 56.78             | 11.37    | 29.79    |
| Penta-InP <sub>5</sub>                           | 48.60             | 11.24    | 22.91    |

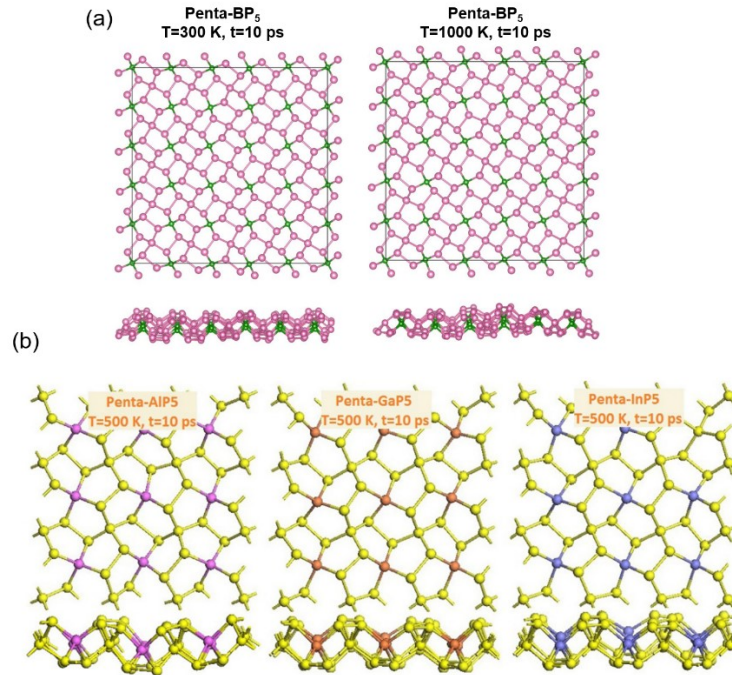

**Figure S1.** (a) Top and side views of the penta-BP<sub>5</sub> monolayer structures at 300 K and 1000 K after 10 ps in the AIMD simulations.<sup>1</sup> (b) Top and side views of the penta-AIP<sub>5</sub>, penta-GaP<sub>5</sub>, penta-InP<sub>5</sub> monolayer structures at 500 K after 10 ps in the AIMD simulations.<sup>2</sup>

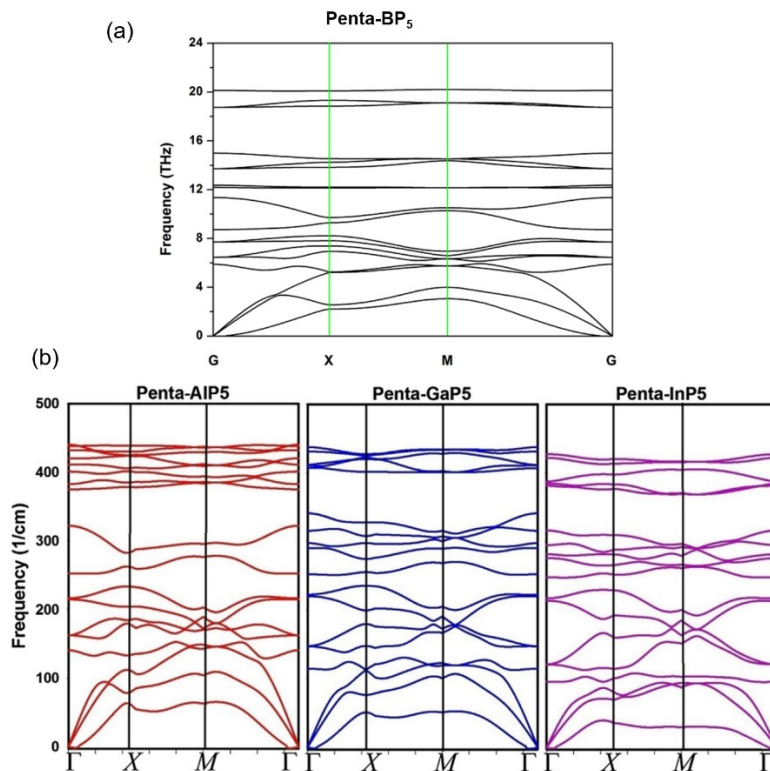

**Figure S2.** (a) the calculated phonon dispersion of Penta-BP<sub>5</sub> monolayers.<sup>1</sup> (b) the calculated phonon dispersion of Penta-AIP<sub>5</sub>, Penta-GaP<sub>5</sub>, Penta-InP<sub>5</sub> monolayers.<sup>2</sup>

## Electronic structures of Penta-MP<sub>5</sub> monolayers for water splitting

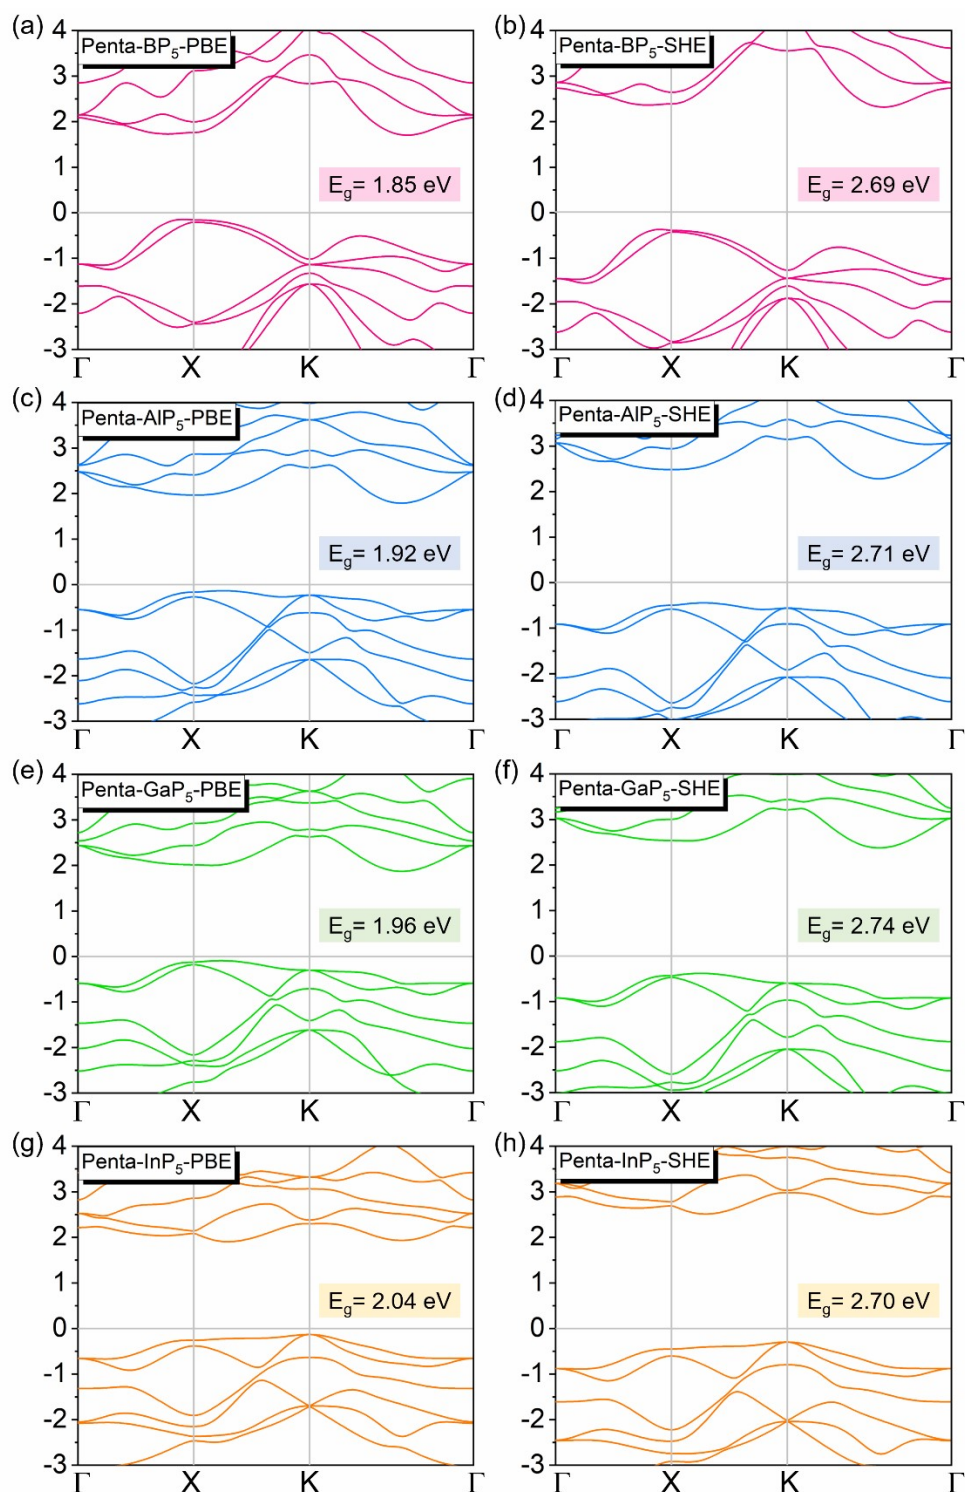

**Figure S3.** The calculated band structures of Penta-MP<sub>5</sub> monolayers relative to the Fermi level in the first Brillouin zone along the path ( $\Gamma$ -X-K- $\Gamma$ ) by the PBE method and hybrid functional method HSE06.

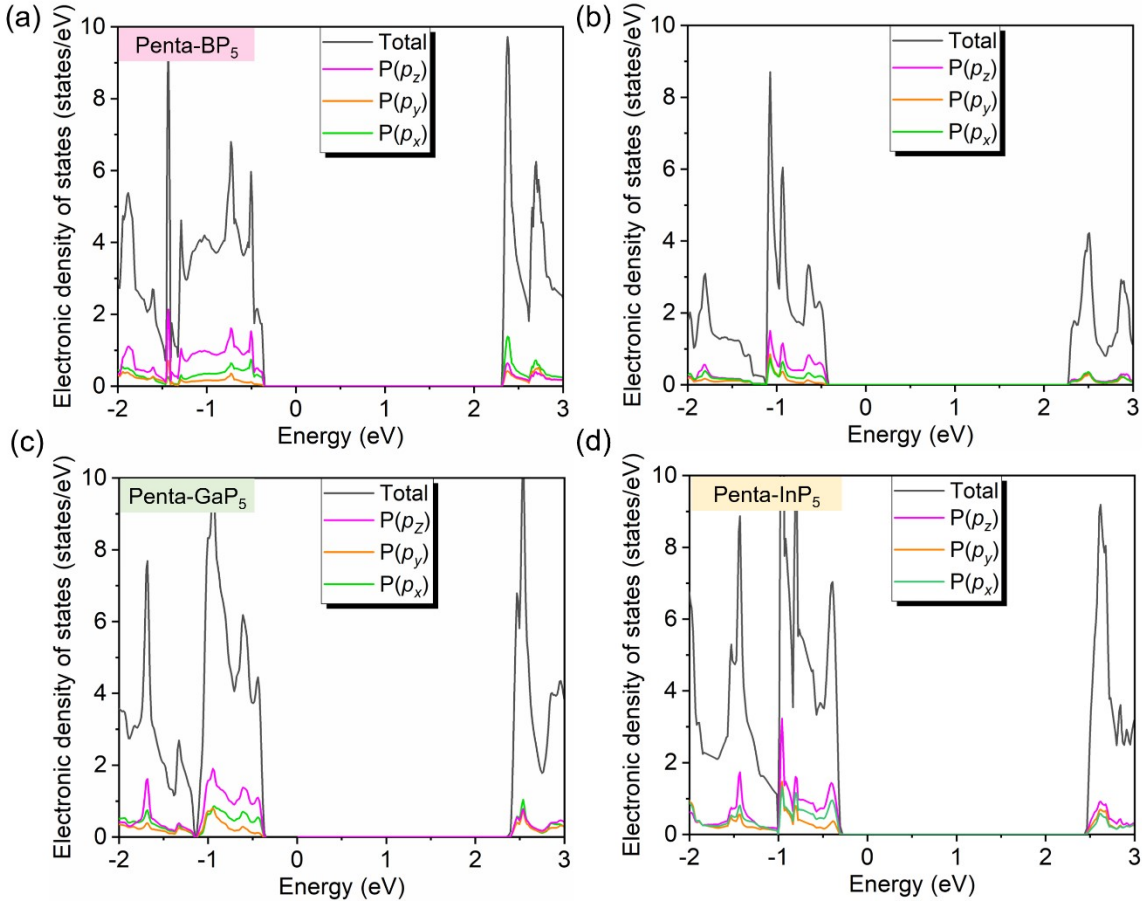

**Figure S4.** The calculated partial DOS of Penta-MP<sub>5</sub> monolayers.

### Stable stacking patterns of bilayer Penta-MP<sub>5</sub>

The most feasible stacking patterns of bilayer Penta-MP<sub>5</sub>, named AA, AB, and AC, are initially considered. As depicted in Figure S5 (a), the AA pattern denotes the overlapping schema, i.e., the upper M atoms are positioned directly overhead the lower M atoms. The AB pattern and AC pattern are constructed by staggered stacking, where the upper layer in the AA pattern is translated with respect to the lower layer. In the AB pattern and AC pattern, the tri-coordinated P atoms and tetra-coordinated P atoms in the upper layer are shifted above the M atoms in the lower layer, respectively, as shown in Figure S5 (b)-(c). After undergoing complete structural optimization, the AB mode is found to be relaxed to the AA pattern. Therefore, we ignore the AB pattern and only consider the AA pattern and AC pattern in the following discussion. By calculating their total energies, we find AA pattern have lower total energies than AC pattern as listed in Table S4. Hence, the AA pattern is more stable than AC pattern.

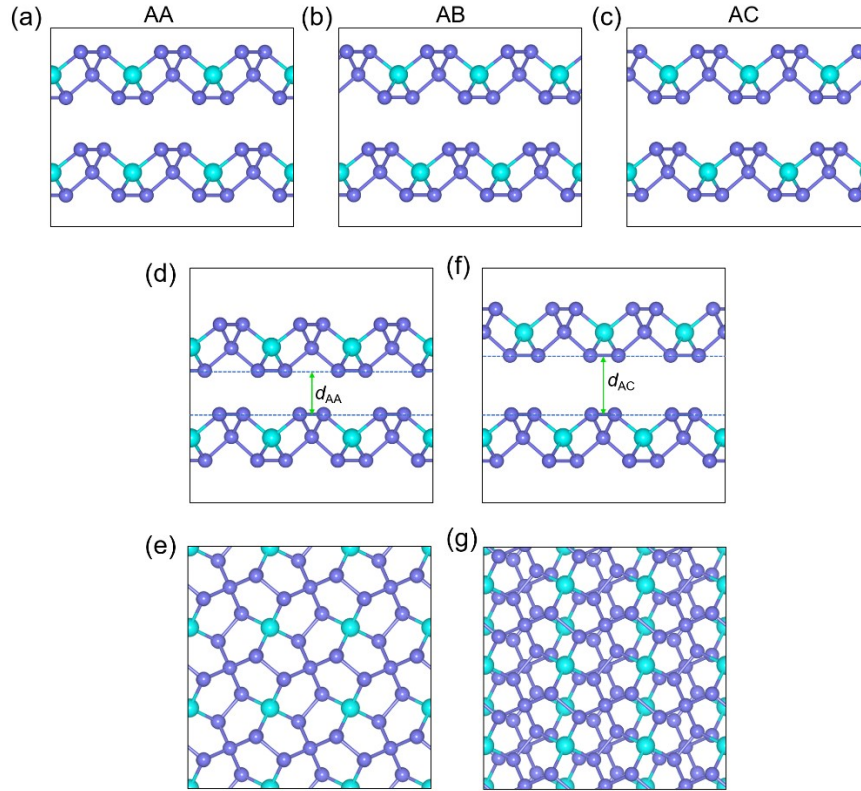

**Figure S5.** The structural models of bilayer Penta- $\text{MP}_5$  stacked in (a) AA pattern, (b) AB pattern and (c) AC pattern. The side (d) and top (e) views of the optimized crystal structures of bilayer Penta- $\text{MP}_5$  stacked in AA and AB. The side (f) and top (g) views of the optimized crystal structures of bilayer Penta- $\text{MP}_5$  stacked in AC.

**Table S4.** The interlayer distance  $d$  (Å), total energies  $E$  (eV/atom) and bandgap  $E_g$ (eV) (in PBE level) of bilayer Penta- $\text{MP}_5$  in AA pattern and AC pattern.

| Penta- $\text{MP}_5$<br>(M = B, Al, Ga, and In) | AA      |               |            | AC      |               |            |
|-------------------------------------------------|---------|---------------|------------|---------|---------------|------------|
|                                                 | $d$ (Å) | $E$ (eV/atom) | $E_g$ (eV) | $d$ (Å) | $E$ (eV/atom) | $E_g$ (eV) |
| Penta- $\text{BP}_5$                            | 2.65    | -5.33         | 1.45       | 3.57    | -5.31         | 1.58       |
| Penta- $\text{AlP}_5$                           | 2.41    | -5.75         | 1.59       | 3.81    | -5.72         | 1.61       |
| Penta- $\text{GeP}_5$                           | 2.46    | -5.18         | 1.43       | 3.60    | -5.16         | 1.62       |
| Penta- $\text{InP}_5$                           | 2.60    | -5.03         | 1.54       | 3.45    | -5.02         | 1.73       |

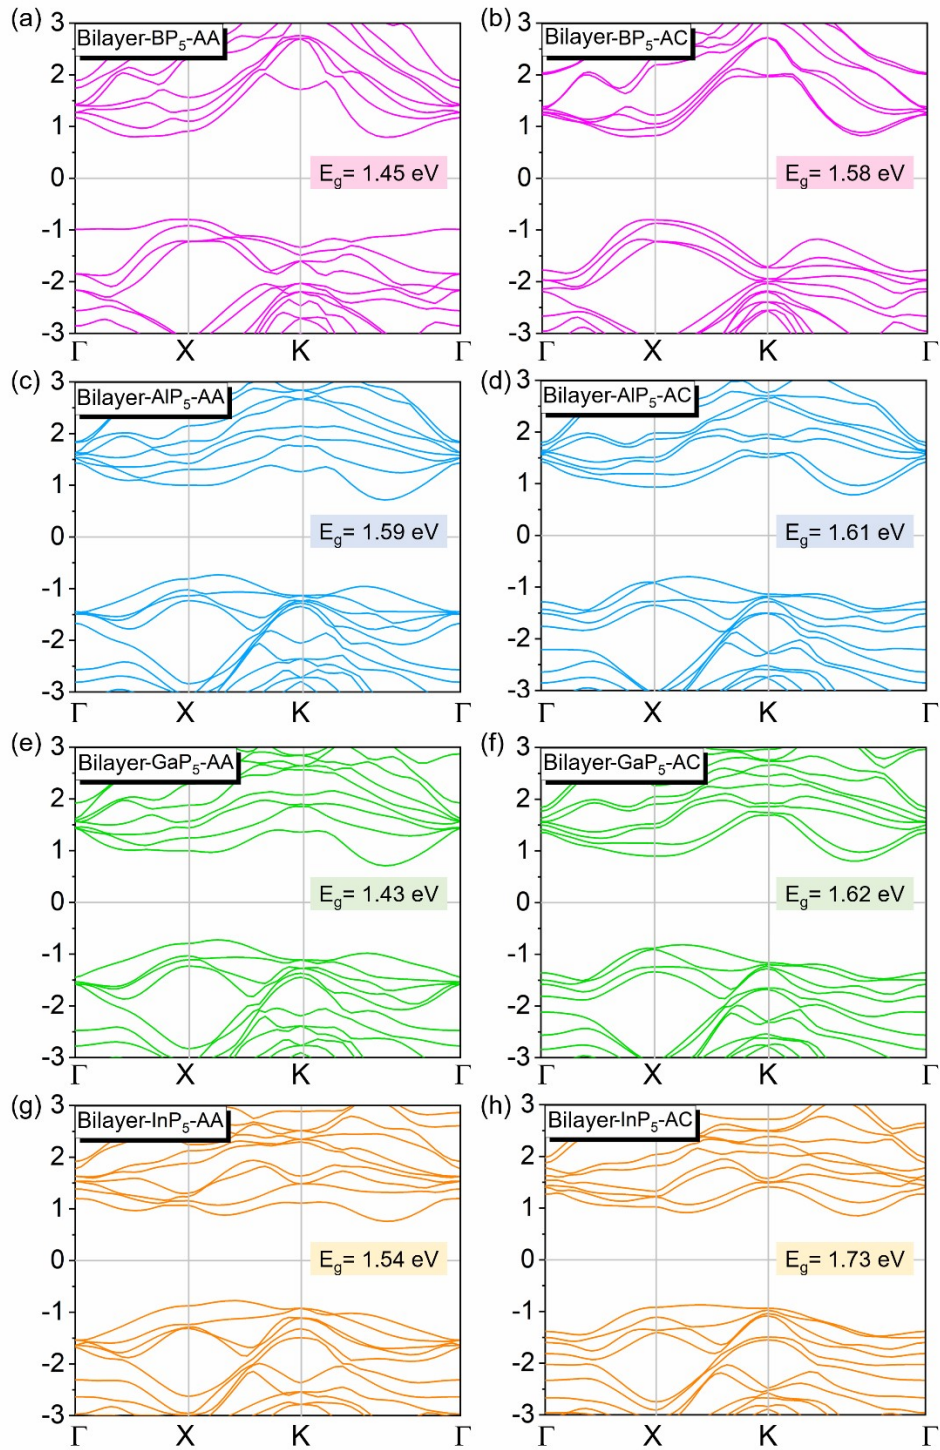

**Figure S6.** The calculated band structures of bilayer Penta- $MP_5$  in AA pattern and AC pattern relative to the Fermi level in the first Brillouin zone along the path ( $\Gamma$ -X-K- $\Gamma$ ) by the PBE method.

## Optical absorption and utilization of Penta-MP<sub>5</sub> monolayers for water splitting

### Computational details for the solar-to-hydrogen (STH) efficiency of Penta-MP<sub>5</sub> monolayers

The STH efficiency is evaluated using the methods proposed by Yang et al<sup>3</sup> defined as the product of the efficiency of light absorption ( $\eta_{abs}$ ) and carrier utilization ( $\eta_{cu}$ ) is calculated as:

$$\eta_{STH} = \eta_{abs} \times \eta_{cu} \quad (S1)$$

The efficiency of light absorption is defined as:

$$\eta_{abs} = \frac{\int_{E_g}^{\infty} P(h\omega) d(h\omega)}{\int_0^{\infty} P(h\omega) d(h\omega)} \quad (S2)$$

where  $P(h\omega)$  is the AM1.5G solar energy flux at the photon energy  $h\omega$  and  $E_g$  is the band gap of the photocatalyst. The efficiency of carrier utilization ( $\eta_{cu}$ ) is defined as:

$$\eta_{cu} = \frac{\Delta G_{H_2O} \int_E^{\infty} \frac{P(h\omega)}{h\omega} d(h\omega)}{\int_{E_g}^{\infty} P(h\omega) d(h\omega)} \quad (S3)$$

where  $\Delta G_{H_2O}$  is the potential difference of 1.23 eV for water splitting and  $E$  is the energy of photons that can actually be utilized for water splitting.

$$E = \begin{cases} E_g, (\chi_{H_2} \geq 0.2, \chi_{O_2} \geq 0.6) \\ E_g + 0.2 - \chi_{H_2}, (\chi_{H_2} < 0.2, \chi_{O_2} \geq 0.6) \\ E_g + 0.6 - \chi_{O_2}, (\chi_{H_2} \geq 0.2, \chi_{O_2} < 0.6) \\ E_g + 0.8 - \chi_{H_2} - \chi_{O_2}, (\chi_{H_2} < 0.2, \chi_{O_2} < 0.6) \end{cases} \quad (S4)$$

### Computational details for carrier mobilities of Penta-MP<sub>5</sub> monolayers.

The effective mass  $m^*$  indicating in different places (VBM for holes and CBM for electrons) is

calculated based on the data about the band structure by the equation:  $m^* = \hbar^2 \left[ \frac{\partial^2 E(k)}{\partial k^2} \right]^{-1}$ , where  $k$

is the wave vector and  $E(k)$  is the energy corresponding to  $k$ . The  $C_{2d} = [\partial^2 E / \partial \delta^2] / S_0$  and



$E_{2d}^* = \partial \Delta E / \partial \delta$  are the in-plane stiffness with the longitudinal strain and the deformation potential as the change of band edges in VBM for holes and CBM for electrons when strains are applied in different directions ( $a$  and  $b$ ), respectively. And  $S_0$  and  $\Delta E$  are the area of the equilibrium supercell and the value of CBM (VBM) relative to the vacuum energy, respectively.  $\delta = \Delta l / l_0$ , and  $E$  is the total energy.

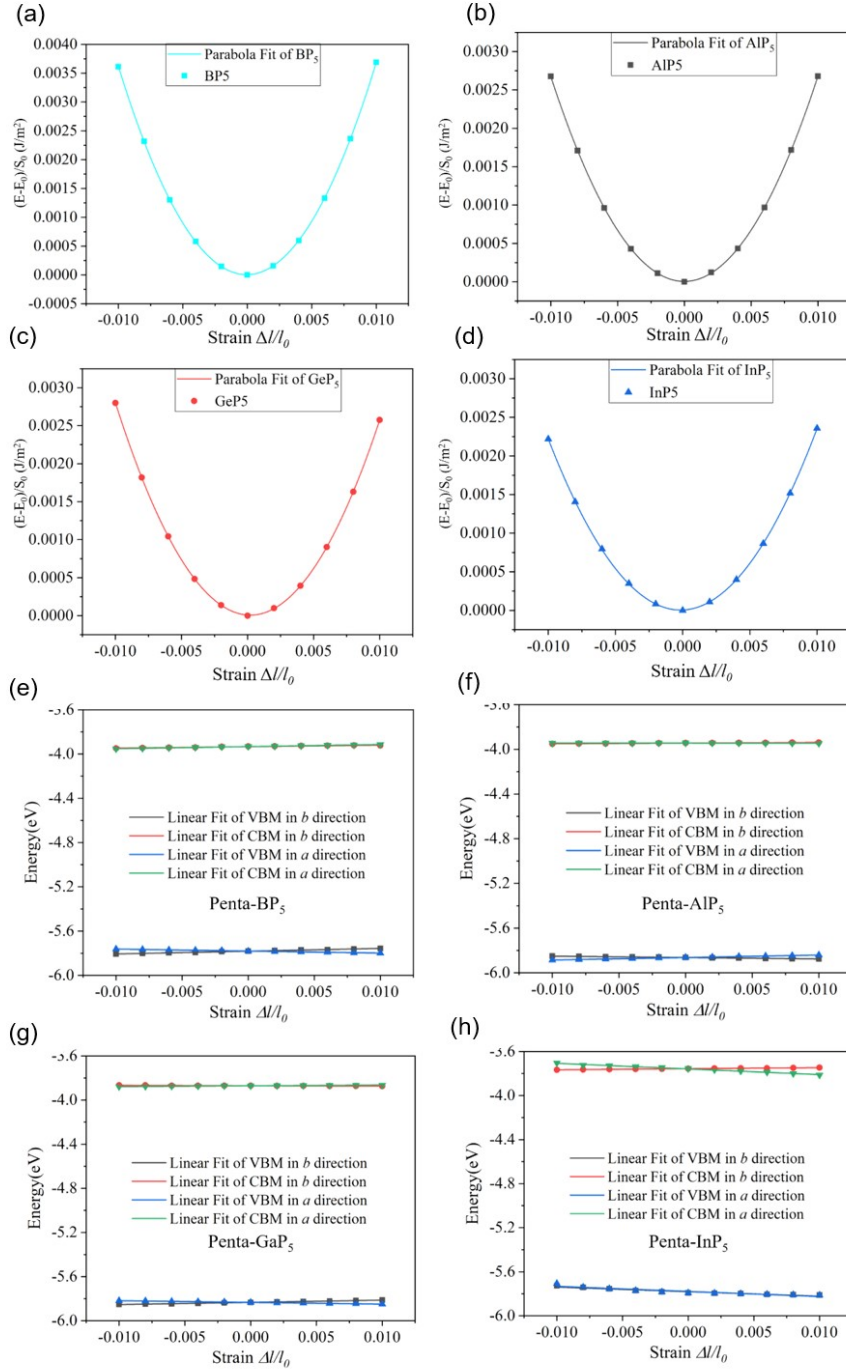

**Figure S7.** (a-d) The calculated total energy of Penta-MP<sub>5</sub> monolayers in  $a$  and  $b$  directions with respect to the strain, respectively. (e-h) The relationship between the shift of VBMs and CBMs with

respect to the vacuum energy and the applied biaxial strain along the  $a$  and  $b$  directions of Penta-MP<sub>5</sub> monolayers.

## Photocatalytic properties of Penta-MP<sub>5</sub> monolayers for water splitting

### Selection of active sites on Penta-MP<sub>5</sub> monolayers

The Penta-MP<sub>5</sub> monolayers are two-dimensional, possessing an infinitely extended atomic surface with thin longitudinal thickness ( $z$ -direction), the active sites are mainly located on their upper and lower surfaces.<sup>3-6</sup> By analyzing their symmetry, we can find that their upper and lower surfaces are identical. Therefore, we need only consider active sites that may be located on either of the two surfaces (e.g., the upper surface). Meanwhile, in order to avoid the adsorption of intermediates groups (H<sub>2</sub>O molecule, -OH, -O and -OOH) leading to excessive distortion of the original structure (Slab), we therefore expanded their unit cells into  $2 \times 2 \times 1$  supercells. By studying the adsorption of H<sub>2</sub>O molecules on their surfaces (consider four adsorption models with a H<sub>2</sub>O adhered in different sites as shown in Figure S8), we find that the H<sub>2</sub>O molecules tend to be close to the phosphorus atoms. The adsorption of H<sub>2</sub>O molecules is the first step in water-splitting reaction that subsequent reactions are based on. Thus, the phosphorus atom can be tentatively chosen as a possible active site for the water-splitting reaction. Through the structural optimization of the intermediates H\*, OH\*, O\* and OOH\* with phosphorus atom as the active site and calculations of the free energy change as shown in Figure 4 and Figure S8, we find that the  $\Delta G(H^*)$  for HER are lower than the potential  $U_e$  supplied by their photoexcited electrons, and the energy barriers of the OER are lower than the potential  $U_h$  supplied by their photoexcited holes. This means that the chosen active site is favorable for the HER reaction and OER reaction, which also verifies our above prediction that phosphorus atom is the active site for the water-splitting reaction.

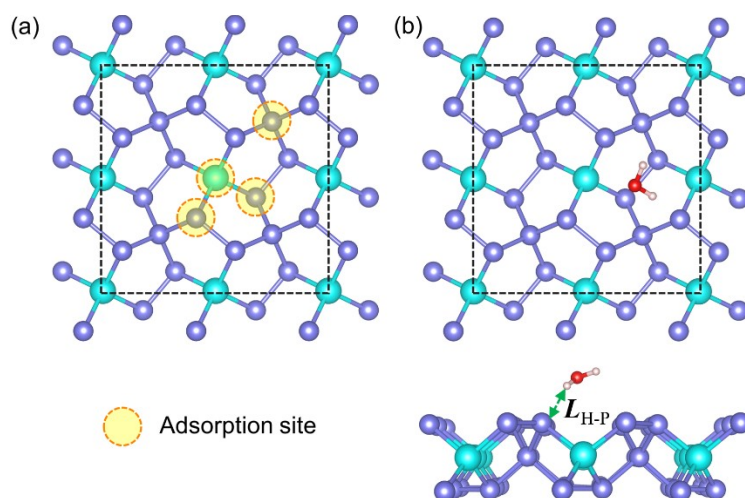

**Figure S8.** (a) The yellow circles indicate the H<sub>2</sub>O molecule adsorption sites on Penta-MP<sub>5</sub> monolayers, (b) the top and side views of the most stable adsorption structures of H<sub>2</sub>O on the surface of Penta-MP<sub>5</sub> monolayers.  $L_{H-P}$  represents the distance between the oxygen atom of the adsorbed H<sub>2</sub>O molecule and its two nearest M atoms.

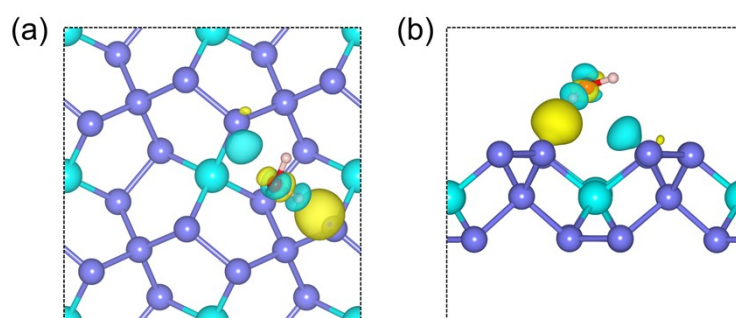

**Figure S9.** The charge density difference of Penta-MP<sub>5</sub> monolayers top (a) and side (b) views.

### Computational details for free energy change of Penta-MP<sub>5</sub> monolayers.

In an aqueous solution, the HER process could be decomposed into two one-electron steps with each step consuming a proton and an electron:

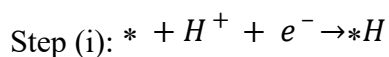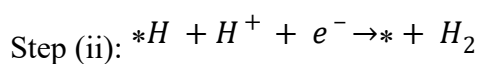

Meanwhile, OER process could be decomposed into four one-electron oxidation steps, corresponding to the deprotonation of water molecules, as follows:

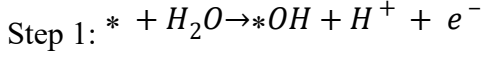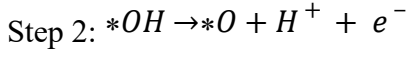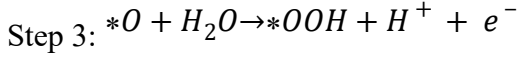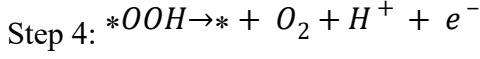

Where \* denotes a site on the surface, \*(radical) denotes the corresponding radical adsorbed on the surface. To calculate the free energy changes involved in HER and OER process, Gibbs free energies:  $G(T) = E + H(T) - TS(T)$  with E denoting the self-consistent field energy for a given species, can be calculated including all relevant finite temperature contributions to enthalpy  $H(T)$  and entropy  $S(T)$ , i.e. vibration, rotation and translation for gas phase species; for adsorbed species only vibrational contributions were considered since rotational and translational motions become frustrated. Considering the effect of the pH value of solvent and external potential U, the Gibbs free energy changes  $\Delta G$  are obtained through the following calculations:

$$\Delta G_i = G(*H) - G(*) - \frac{1}{2}G(H_2) + \Delta pH - eU_e$$

$$\Delta G_{ii} = G(*) - G(*H) + \frac{1}{2}G(H_2) + \Delta pH - eU_e$$

$$\Delta G_1 = \frac{1}{2}G(H_2) - G(*OH) - G(*H) - G(H_2O) - \Delta pH - eU_h$$

$$\Delta G_2 = \frac{1}{2}G(H_2) + G(*O) - G(*OH) - \Delta pH - eU_h$$

$$\Delta G_3 = \frac{1}{2}G(H_2) + G(*OOH) - G(H_2O) - \Delta pH - eU_h$$

$$\Delta G_4 = \frac{1}{2}G(H_2) + G(*) - G(*OOH) + G(O_2) - \Delta pH - eU_h$$

Where  $G(H^+ + e^-)$  is replaced by  $\frac{1}{2}G(H_2)$ , considering the reaction of  $H^+ + e^- \leftrightarrow \frac{1}{2}H_2$  is in equilibrium state at standard condition (pH = 0, T = 298K, 1atm).  $\Delta pH = 0.059 \times pH$  is used to estimate the effect of pH value of solvent. Furthermore, the Gibbs free energy is shifted by the applied oxidation ( $eU_e$ ) or reduction ( $eU_h$ ) potential because of the photo-induced electrons or holes. For photocatalytic reactions.  $U_e$  and  $U_h$  are the potentials for HER and OER, respectively. Herein, the  $U_e$  and  $U_h$  are the energy difference of CBM and VBM relative to hydrogen reduction potential ( $H^+/H_2$ ).

**Table S5.** The calculated Gibbs free energy changes  $\Delta G$  (eV) of different reaction intermediates in OER on Penta-MP<sub>5</sub> monolayers

| Penta-MP <sub>5</sub>  | pH = 0       |              |              |              | pH = 7 (eV)  |              |              |              |
|------------------------|--------------|--------------|--------------|--------------|--------------|--------------|--------------|--------------|
|                        | $\Delta G_1$ | $\Delta G_2$ | $\Delta G_3$ | $\Delta G_4$ | $\Delta G_1$ | $\Delta G_2$ | $\Delta G_3$ | $\Delta G_4$ |
| Penta-BP <sub>5</sub>  | 1.17         | 1.13         | 2.16         | 0.46         | 0.76         | 0.71         | 1.75         | 0.05         |
| Penta-AlP <sub>5</sub> | 1.25         | 1.63         | 1.89         | 0.16         | 0.84         | 1.21         | 1.47         | -0.26        |
| Penta-GaP <sub>5</sub> | 1.26         | 1.52         | 1.73         | 0.41         | 0.85         | 1.11         | 1.32         | -0.01        |
| Penta-InP <sub>5</sub> | 1.20         | 1.62         | 1.67         | 0.43         | 0.78         | 1.21         | 1.26         | 0.02         |

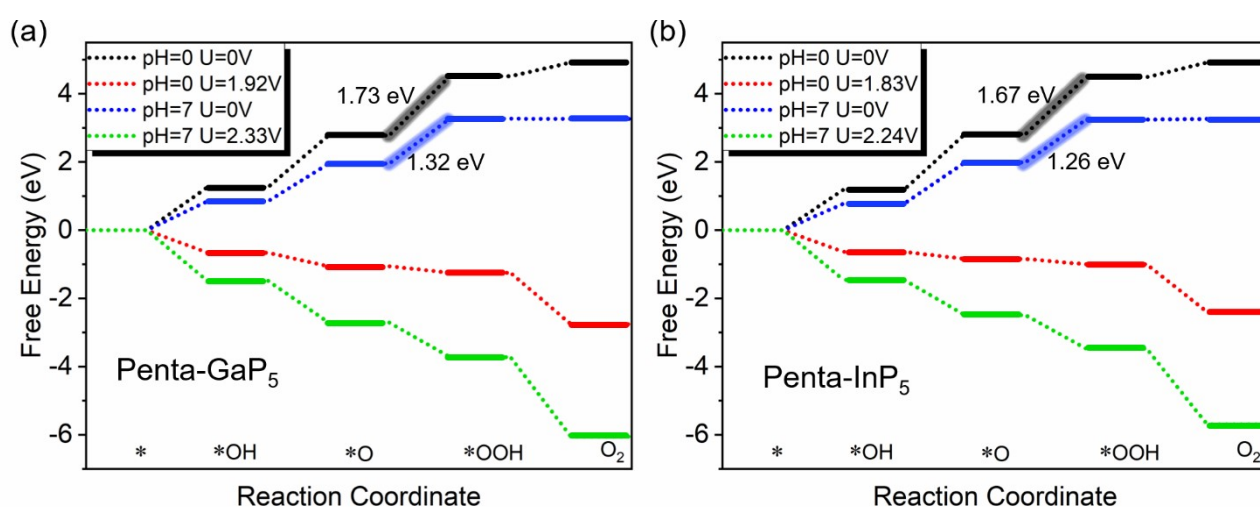

**Figure S10.** (a)-(b) the calculated Gibbs free energy changes of intermediate states involved in OER processes for Penta-GaP<sub>5</sub> and Penta-InP<sub>5</sub> monolayers at pH = 0 and pH = 7. The short grey and blue broad lines in the diagram indicate the rate-limiting step of the OER without illumination.

## References

1. S. Liu, B. Liu, X. Shi, J. Lv, S. Niu, M. Yao, Q. Li, R. Liu, T. Cui and B. Liu, *Scientific Reports*, 2017, **7**, 2404.
2. M. Naseri, *Chemical Physics Letters*, 2018, **706**, 99-106.
3. C.-F. Fu, J. Sun, Q. Luo, X. Li, W. Hu and J. Yang, *Nano Letters*, 2018, **18**, 6312-6317.
4. B. Wei, Z. Fu, D. Legut, T. C. Germann, S. Du, H. Zhang, J. S. Francisco and R. Zhang, *Adv Mater*, 2021, **33**, e2102595.
5. K. Liu, J. Fu, Y. Lin, T. Luo, G. Ni, H. Li, Z. Lin and M. Liu, *Nature Communications*, 2022, **13**, 2075.
6. Q. Xiang and J. Yu, *J. Phys. Chem. Lett.*, 2013, **4**, 753–759.
